# Supplementary material for: Antibiofilm activity of tert-BuOH functionalized ionic liquids with methylsulfonate counteranions
Source: Royal Society of Chemistry journal article supplement (doi:10.1039/c5ra12854d), 2015-01-01

## Supporting Information

# **Antibiofilm Activity of *tert*-BuOH Functionalized Ionic Liquids with Methylsulfonate counteranion**

**Govinda R. Navale<sup>1</sup>, Mahesh Dharne<sup>2\*</sup> and Sandip S. Shinde<sup>1\*</sup>**

<sup>1</sup>Organic Chemistry Division, <sup>2</sup>NCIM Resource Centre, CSIR-National Chemical Laboratory, Dr. Homi Bhabha Road, Pune 411008, Maharashtra, India

**Figure 1**

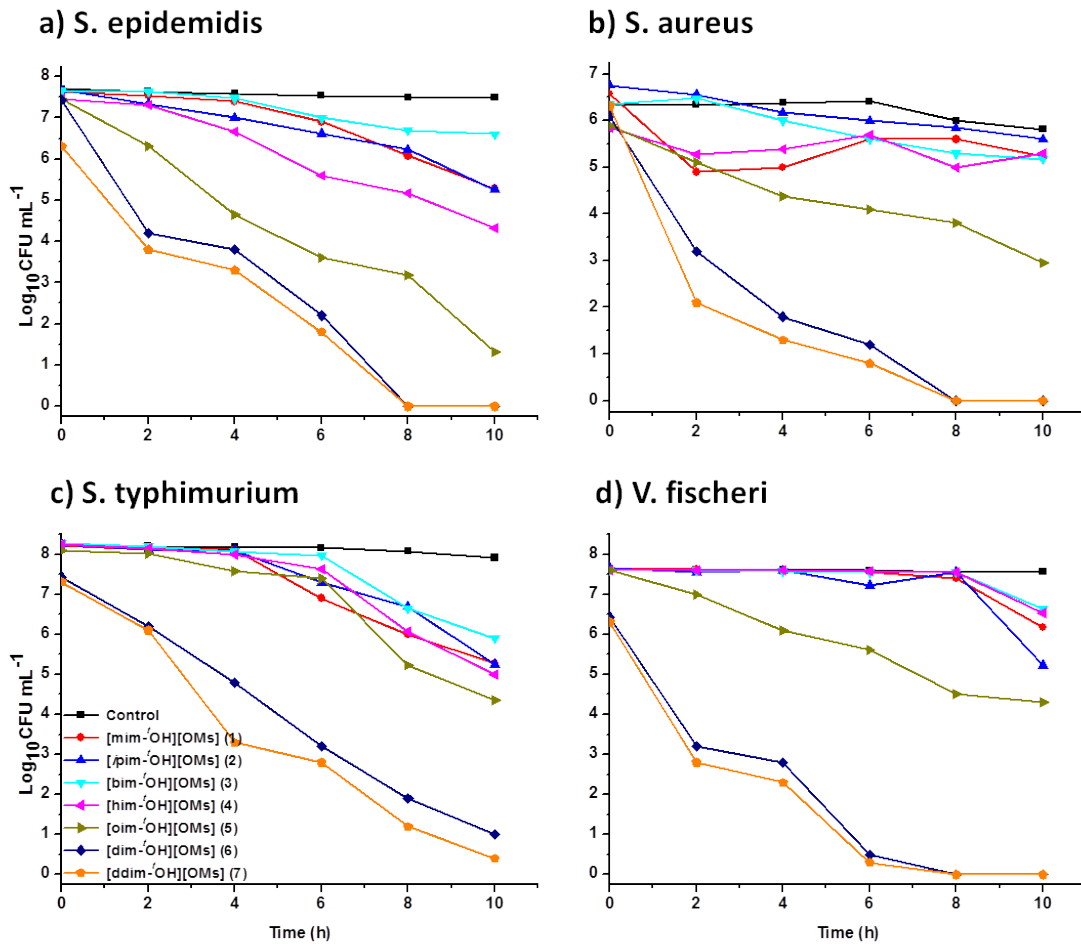

**Fig. 1** Inhibitory effect [alkyl-im-'OH][OMs] ILs against four bacteria over 10 h of exposure time. Each data point represents a log of an average of colony forming units (CFU per mL).

**Figure 2**

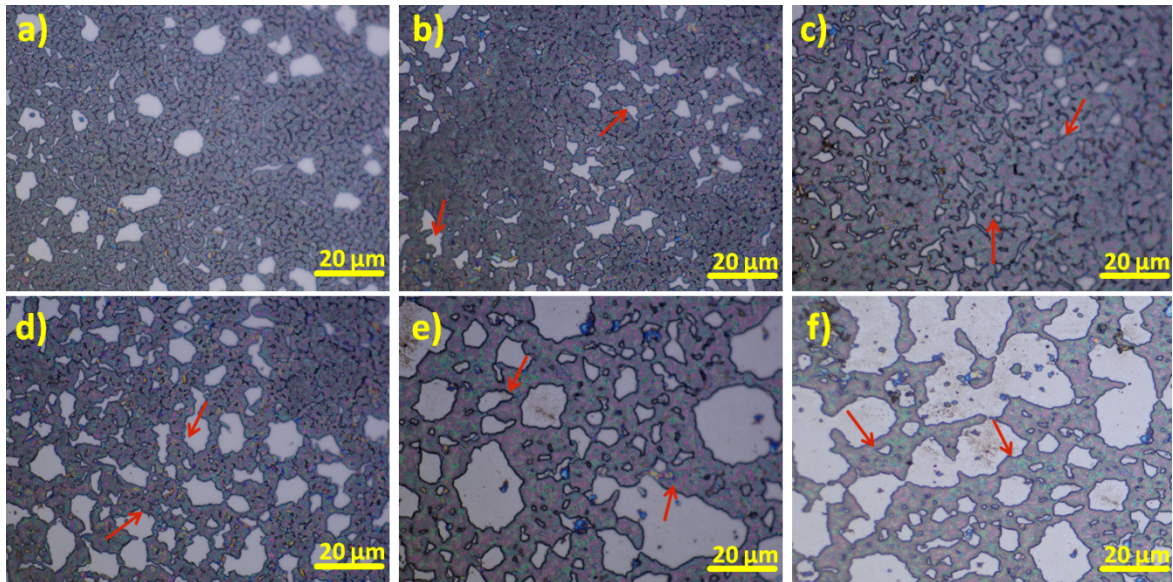

**Fig.2.** Optical microscopic images distorted morphology (indicated by red arrows) of *S. epidermidis* biofilm after exposure of 100 μM concentration IL's for 4 h where, a) Control (without ionic liquids), b) mim-'OH (C<sub>1</sub>), c) ipim-'OH C<sub>3</sub>), d) bim-'OH (C<sub>4</sub>), e) him-'OH (C<sub>6</sub>), f) Oim-'OH (C<sub>8</sub>).

1-(2-hydroxy-2-methyl-*n*-propyl)-3-*n*-dodecylimadazolium mesylate, [C<sub>12</sub>-<sup>t</sup>OHim][OMs].

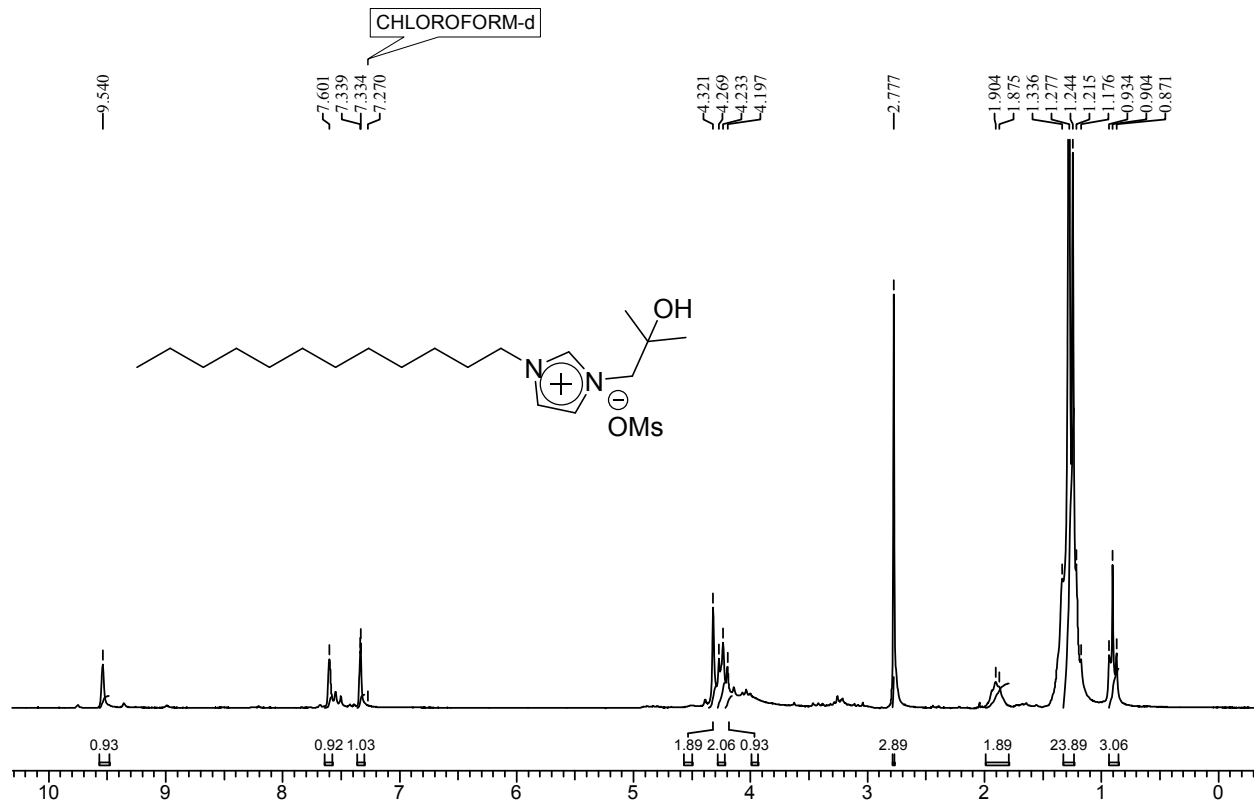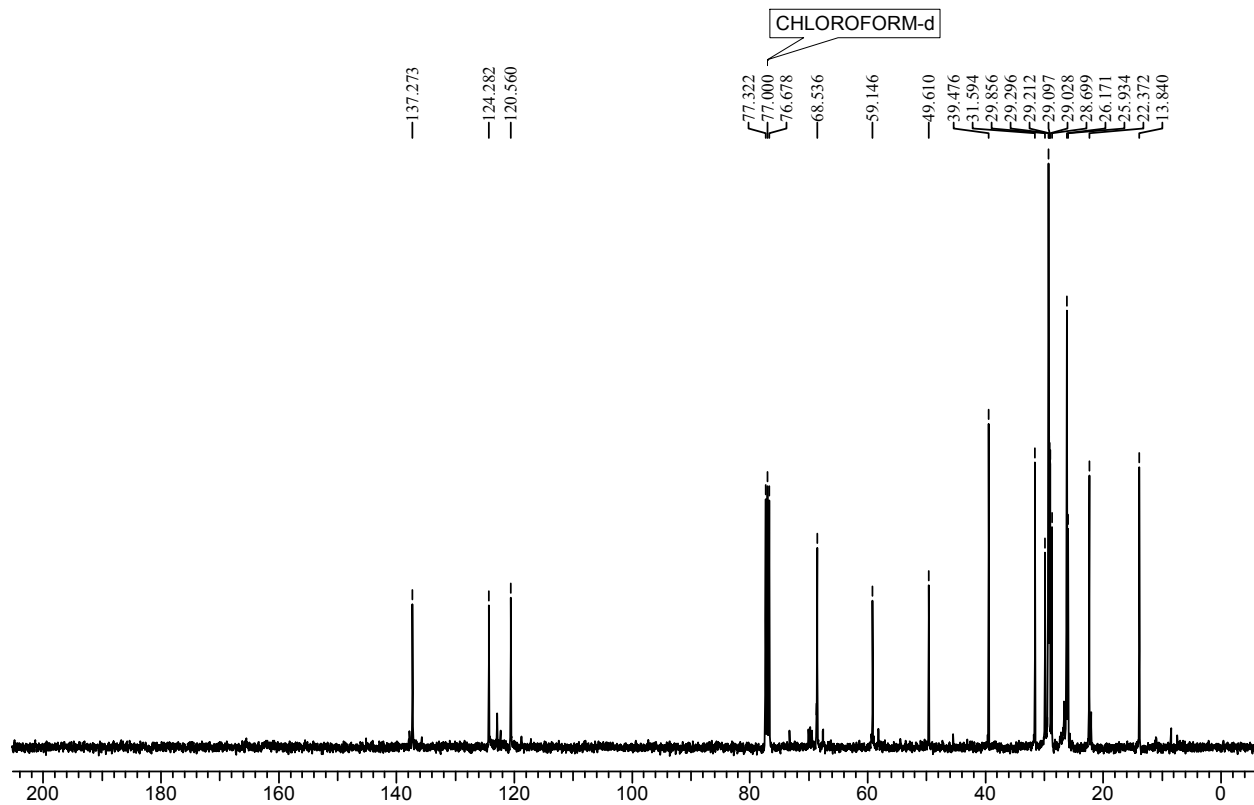

# 1-(2-hydroxy-2-methyl-*n*-propyl)-3-*n*-decylimadazolium mesylate [C<sub>10</sub>-<sup>t</sup>OHim][OMs].

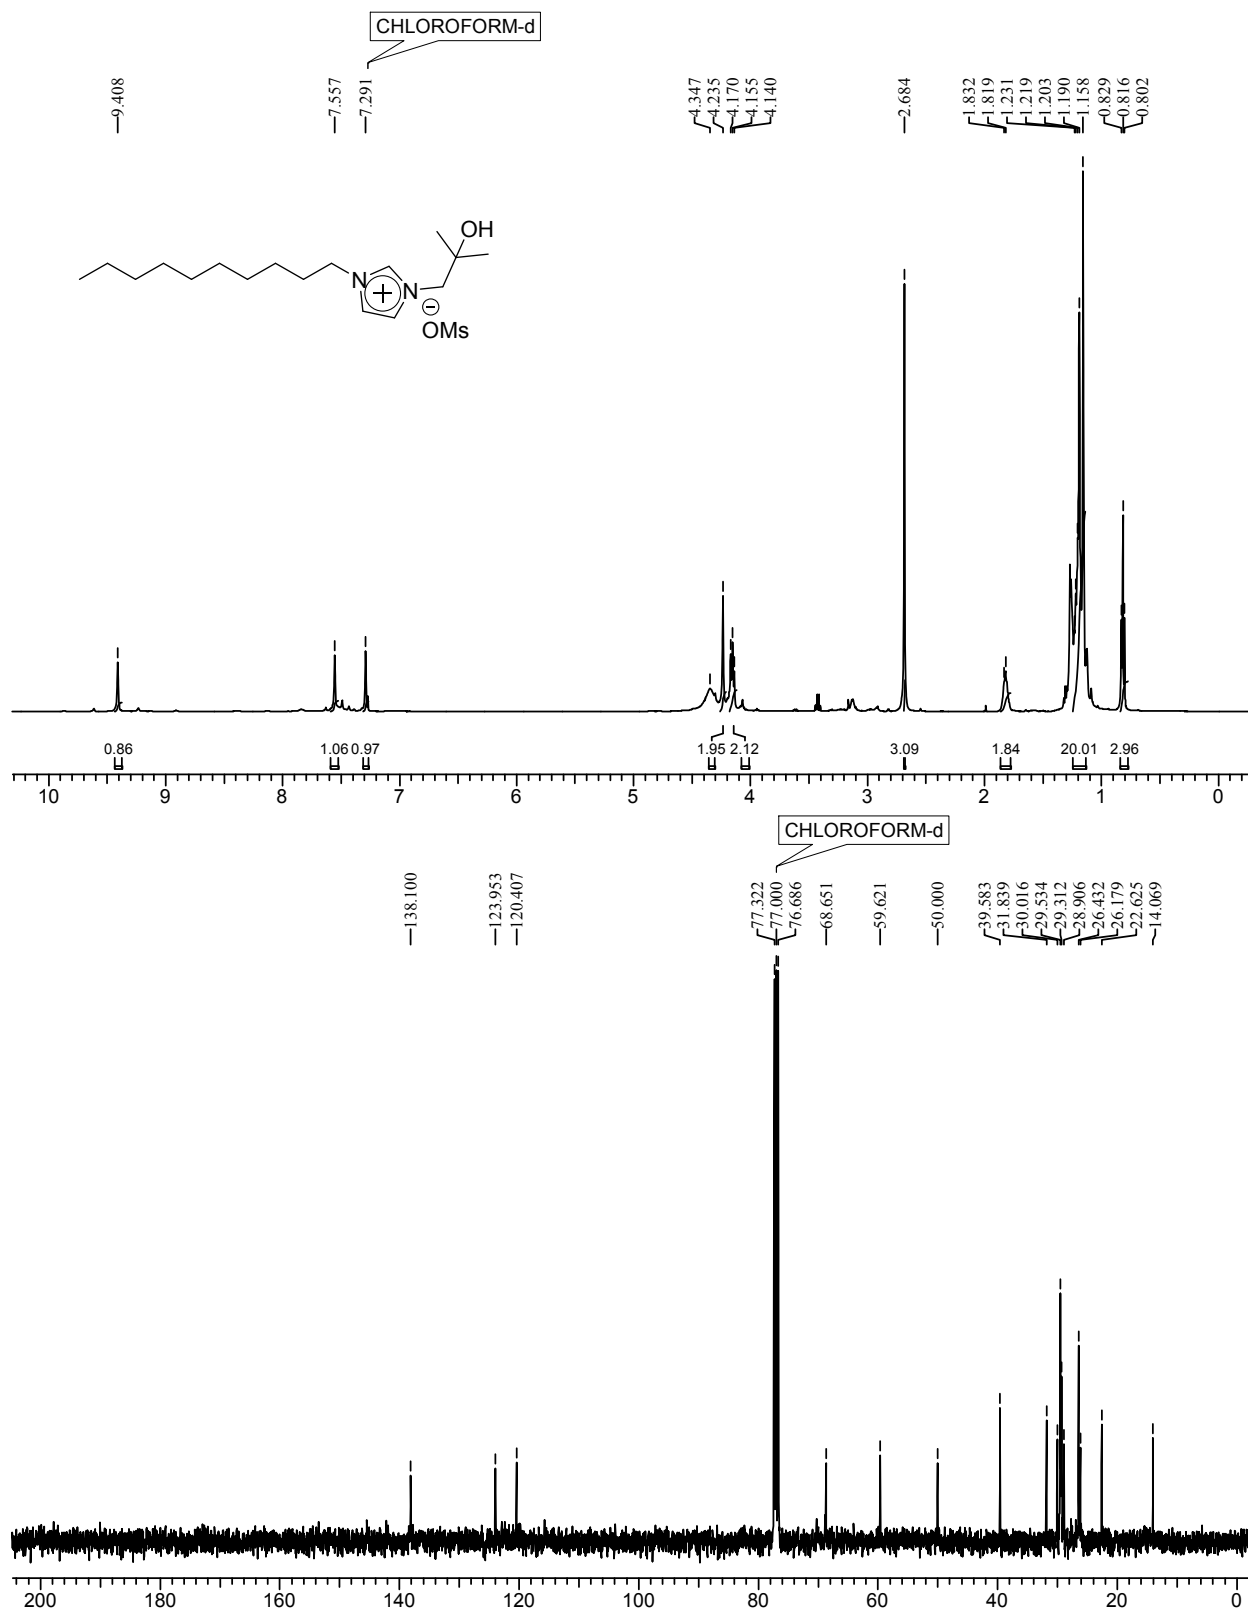

1-(2-hydroxy-2-methyl-*n*-propyl)-3-*n*-octylimadazolium mesylate [C<sub>8</sub>-<sup>t</sup>OHim][OMs].

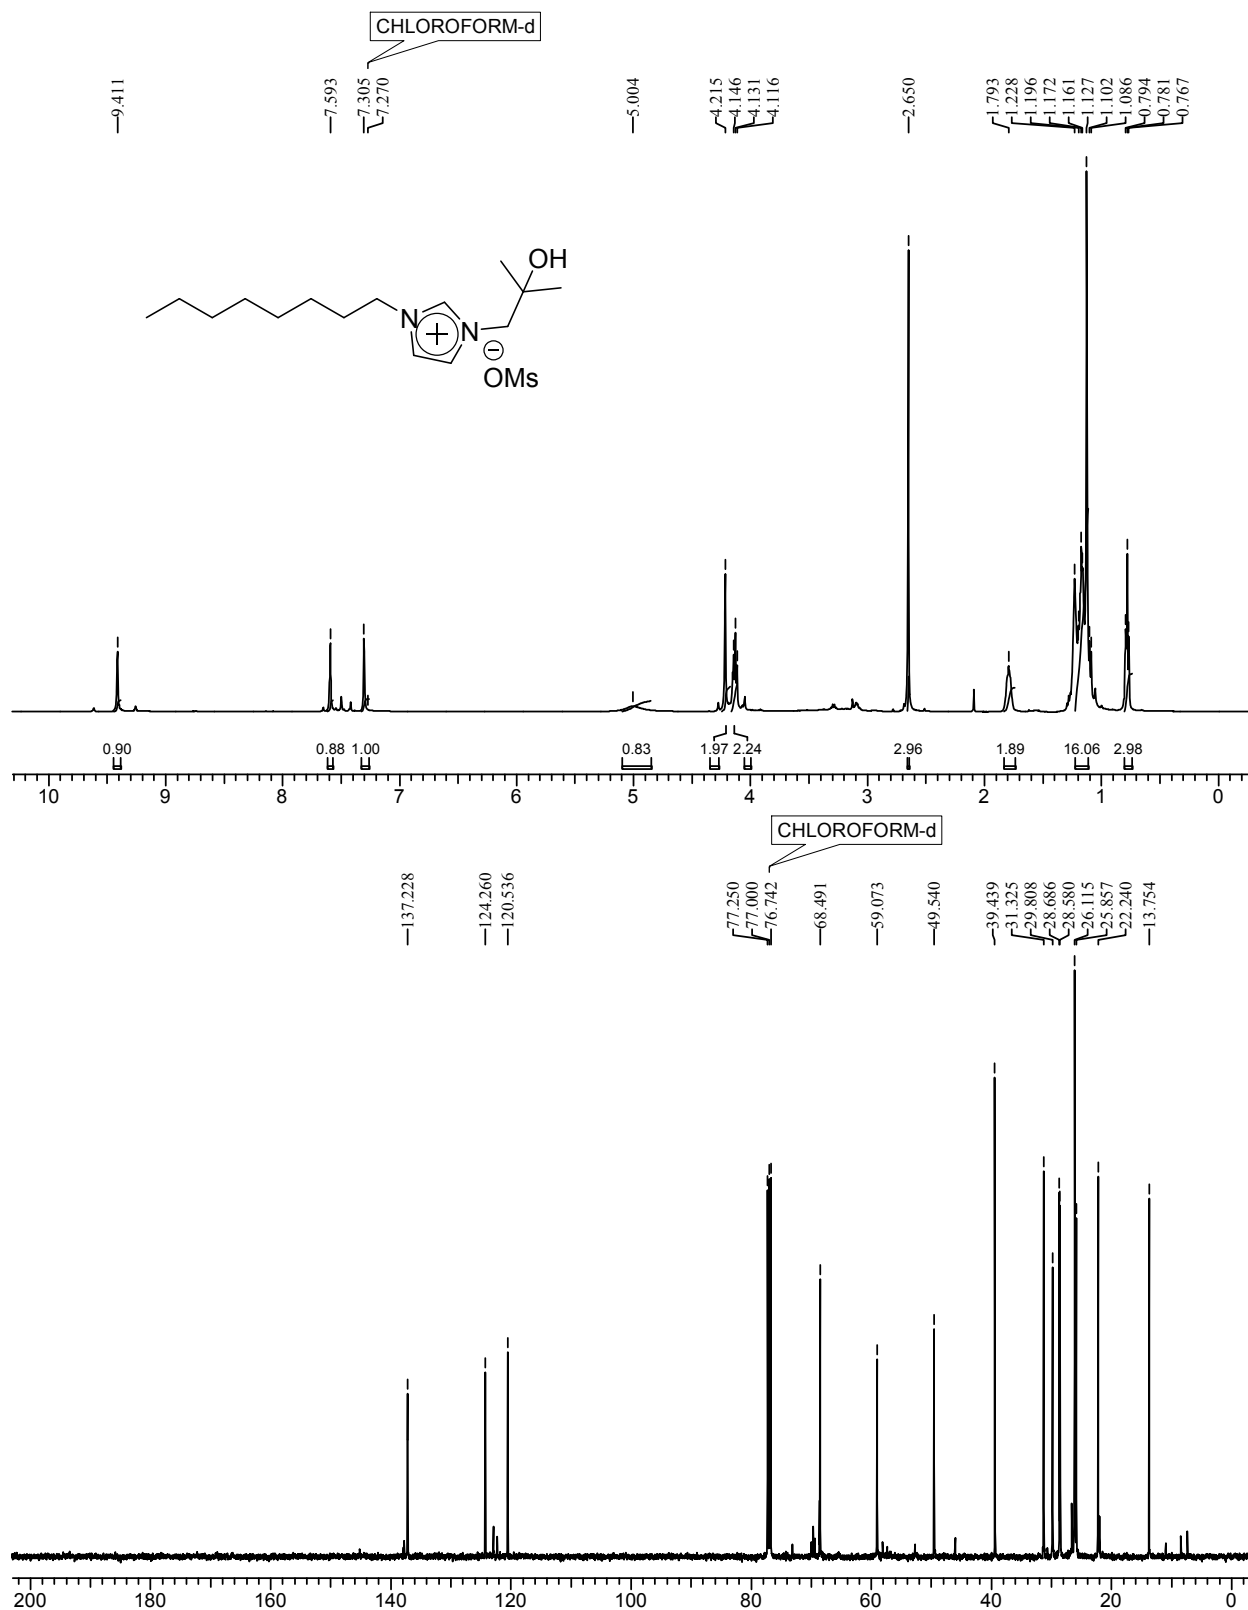

Supplement: c5ra12854d1.pdf [file c5ra12854d1.pdf]
